# Supplementary material for: Thawed cryopreserved synovial mesenchymal stem cells show comparable effects to cultured cells in the inhibition of osteoarthritis progression in rats
Source: PubMed Central journal article supplement (PMC8102597; doi:10.1038/s41598-021-89239-8), 2021-05-06
Supplement: 41598_2021_89239_MOESM1_ESM.pdf [file 41598_2021_89239_MOESM1_ESM.pdf]

## **Thawed cryopreserved synovial mesenchymal stem cells show comparable effects to cultured cells in the inhibition of osteoarthritis progression in rats**

Kiyotaka Horiuchi<sup>1</sup>, Nobutake Ozeki<sup>1</sup>, Kentaro Endo<sup>1</sup>, Mitsuru Mizuno<sup>1</sup>, Hisako Katano<sup>1</sup>, Masako Akiyama<sup>2</sup>, Kunikazu Tsuji<sup>3</sup>, Hideyuki Koga<sup>4</sup> and Ichiro Sekiya<sup>1</sup>

<sup>1</sup>Center for Stem Cell and Regenerative Medicine, Tokyo Medical and Dental University, 1-5-45, Bunkyo-ku, Yushima, Tokyo, Japan

<sup>2</sup>Research Administration Division, Tokyo Medical and Dental University, Tokyo, Japan.

<sup>3</sup>Department of Cartilage Regeneration, Tokyo Medical and Dental University, Tokyo, Japan.

<sup>4</sup>Department of Joint Surgery and Sports Medicine, Tokyo Medical and Dental University, Tokyo, Japan.

### **\* Correspondence information:**

Ichiro Sekiya, MD, PhD

Director and Professor, Center for Stem Cell and Regenerative Medicine

Tokyo Medical and Dental University

1-5-45 Yushima, Bunkyo-ku, Tokyo 113-8510, Japan

Phone: +81-3-5803-4017

FAX: +81-3-5803-0192

E-mail: [sekiya.arm@tmd.ac.jp](mailto:sekiya.arm@tmd.ac.jp)

## SUPPLEMENTARY INFORMATION

Additional supporting information may be found in the online version of this article:

### Supplementary Figure 1

#### Cultured

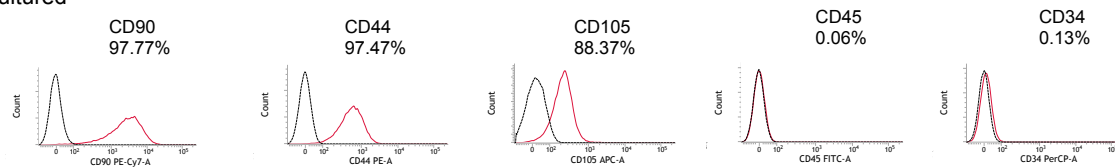

#### Thawed

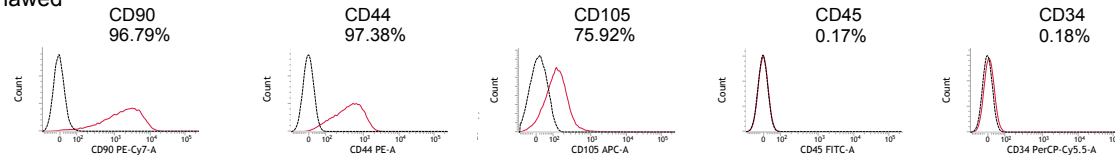

#### 100% FBS

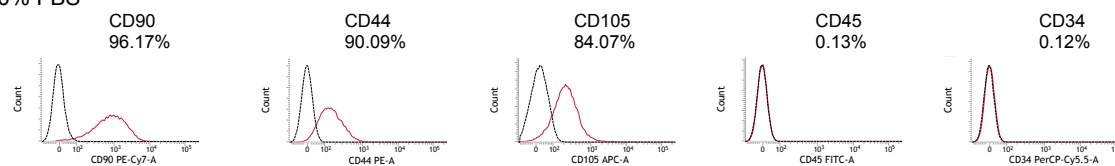

**Supplementary Figure 1. Representative histogram of surface epitopes. Black line shows isotype control.**
