# Supplementary material for: Thawed cryopreserved synovial mesenchymal stem cells show comparable effects to cultured cells in the inhibition of osteoarthritis progression in rats
Source: PubMed Central journal article supplement (PMC8102597; doi:10.1038/s41598-021-89239-8), 2021-05-06
Supplement: 41598_2021_89239_MOESM2_ESM.pdf [file 41598_2021_89239_MOESM2_ESM.pdf]

## **Thawed cryopreserved synovial mesenchymal stem cells show comparable effects to cultured cells in the inhibition of osteoarthritis progression in rats**

Kiyotaka Horiuchi<sup>1</sup>, Nobutake Ozeki<sup>1</sup>, Kentaro Endo<sup>1</sup>, Mitsuru Mizuno<sup>1</sup>, Hisako Katano<sup>1</sup>, Masako Akiyama<sup>2</sup>, Kunikazu Tsuji<sup>3</sup>, Hideyuki Koga<sup>4</sup> and Ichiro Sekiya<sup>1</sup>

<sup>1</sup>Center for Stem Cell and Regenerative Medicine, Tokyo Medical and Dental University, 1-5-45, Bunkyo-ku, Yushima, Tokyo, Japan

<sup>2</sup>Research Administration Division, Tokyo Medical and Dental University, Tokyo, Japan.

<sup>3</sup>Department of Cartilage Regeneration, Tokyo Medical and Dental University, Tokyo, Japan.

<sup>4</sup>Department of Joint Surgery and Sports Medicine, Tokyo Medical and Dental University, Tokyo, Japan.

### **\* Correspondence information:**

Ichiro Sekiya, MD, PhD

Director and Professor, Center for Stem Cell and Regenerative Medicine

Tokyo Medical and Dental University

1-5-45 Yushima, Bunkyo-ku, Tokyo 113-8510, Japan

Phone: +81-3-5803-4017

FAX: +81-3-5803-0192

E-mail: [sekiya.arm@tmd.ac.jp](mailto:sekiya.arm@tmd.ac.jp)

## SUPPLEMENTARY INFORMATION

Additional supporting information may be found in the online version of this article:

Supplementary Figure 2

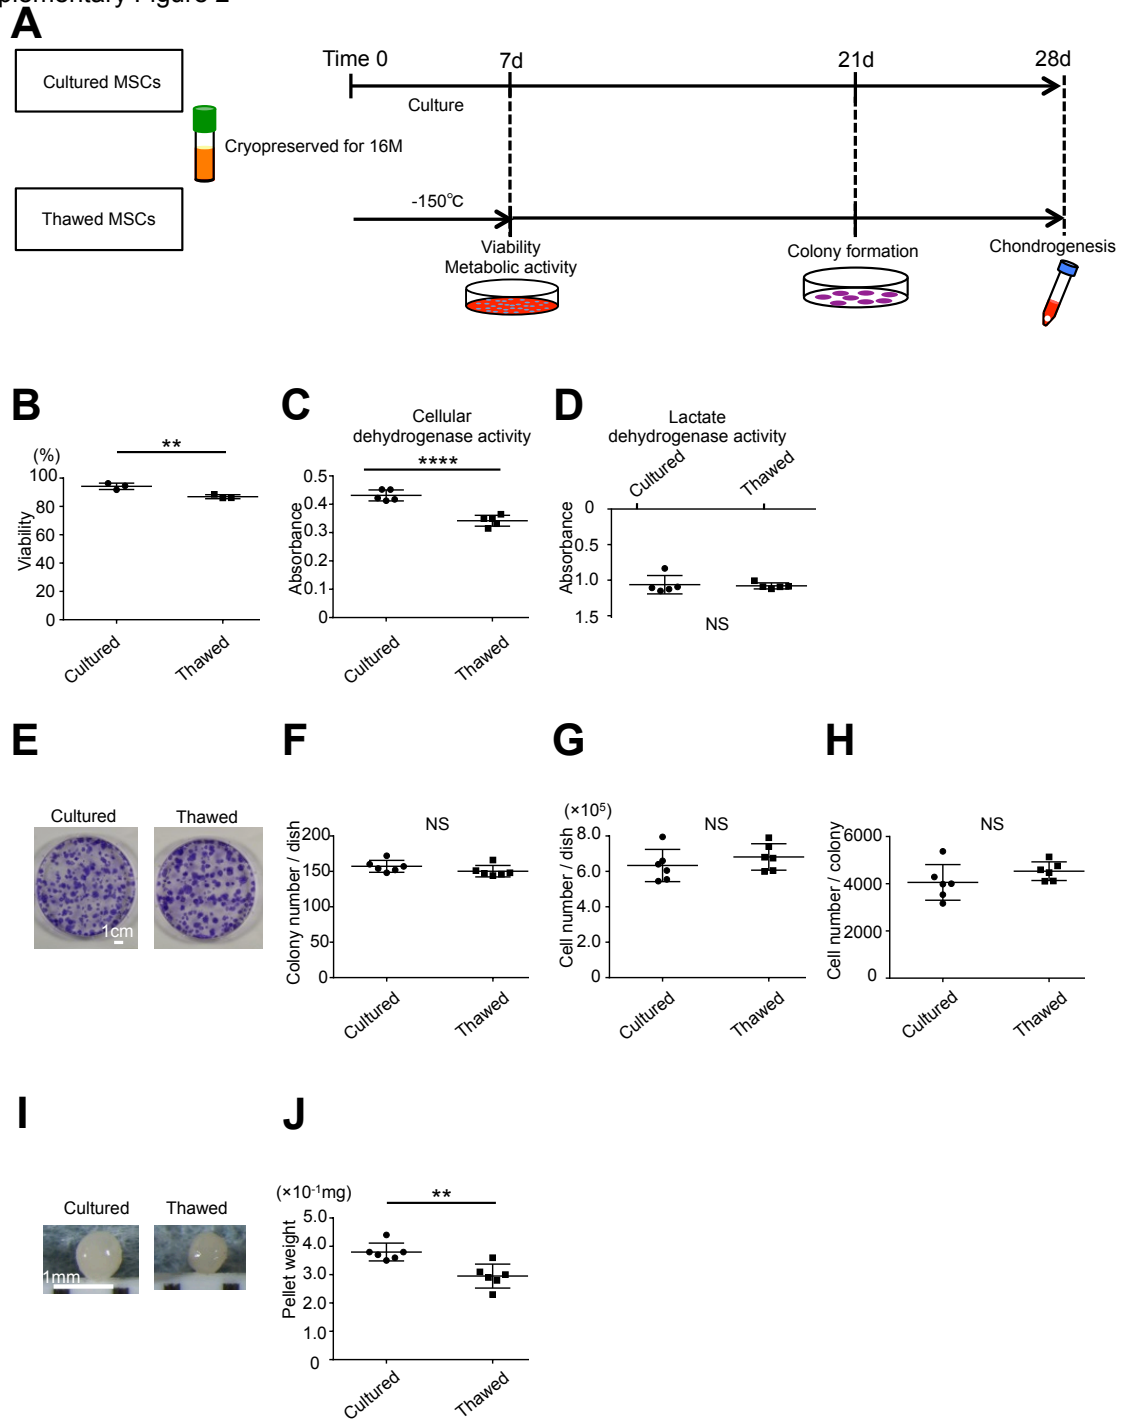

**Supplementary Figure 2. Effects of 16 months of cryopreservation on the in vitro viability and properties of rat synovial MSCs.** (A) Scheme: A sample of  $1 \times 10^6$  synovial MSCs suspended in 1000  $\mu\text{L}$  preservation fluid containing 95% FBS with 5% DMSO was cryopreserved at  $-150\text{ }^\circ\text{C}$  for 16 months and then used as thawed MSCs. Thawed MSCs were also cultured for 1 week for use as cultured MSCs. The cells were analyzed for viability and metabolic activity. A 0.5  $\mu\text{L}$  volume of cell suspension (containing 500 cells, including living and dead cells) was allocated to a 60  $\text{cm}^2$  dish and cultured for colony formation. A 250  $\mu\text{L}$  volume of cell suspension (containing  $2.5 \times 10^5$  cells, including living and dead cells) was allocated to a 15 mL tube and cultured for chondrogenesis. (B) Viability was assessed by trypan blue staining. The average with SD is shown (n=3). (C) Cellular dehydrogenase activity was used to confirm live cell metabolic activity (n=5). (D) Lactate dehydrogenase activity was used as a marker of dead cells (n=5). (E) Colony formation: colonies were stained with crystal violet. (F) Colony number per dish (n=6). (G) Cell number per dish (n=6). (H) Cell number per colony (n=6). (I) Cartilage pellets. (J) Cartilage pellet weight (n=6). ND, not detected; NS, not significant; \*\*p < 0.01, \*\*\*\*p < 0.0001 by Student's t-test (Fig. 1B, C and D) or Mann-Whitney's U test (Fig. 1F, G, H and J).
